# Supplementary material for: Effects of Environmental and Disturbance Factors on Plant Community Distribution in Tropical Moist Afromontane Forests, South-West Ethiopia
Source: Hindawi journal article supplement (doi:10.1155/2023/8521303), 2023-04-06
Supplement: f1 [file 8521303.f1.docx]

**Appendix 1**: List of plant species and community types in four site, (Key: C1, C2, C3, C4 = Community 1, 2, 3 and 4, Indval cls= indicator values in the class

| **No** | **PC** | **Scientific Name** | **Family Name** | **GH** | **Synoptic cover value of species** | | | | **Indcls** | **P-value** |
| --- | --- | --- | --- | --- | --- | --- | --- | --- | --- | --- |
| **C1** | **C2** | **C3** | **C4** |
| 1 | T60 | *Acacia polyacantha* Wild | Fabaceae | T | 0.000 | 0.000 | 0.000 | 0.333 | 0.167 | 0.001 |
| 2 | S4 | *Acalypha orbata* A.R | Euporbiaceae | S | 0.028 | 0.600 | 0.159 | 0.000 | 0.244 | 0.001 |
| 3 | S10 | *Acanthopale aethio-germanica* Ensermu | Acanthaceae | S | 0.000 | 0.000 | 0.023 | 0.429 | 0.244 | 0.001 |
| 4 | S3 | *Acanthopale pubescens* (Lindau ex Engl.) CB. Clarke | Acanthaceae | S | 0.000 | 0.120 | 0.455 | 0.000 | 0.198 | 0.002 |
| 5 | H11 | *Achyranthes aspera* L. | Amaranthaceae | H | 0.000 | 0.120 | 0.432 | 0.000 | 0.16 | 0.007 |
| 6 | H2 | *Adianthum thalictroides* schltd | Adianthaceae | H | 0.056 | 0.240 | 0.045 | 0.000 | 0.169 | 0.005 |
| 7 | T53 | *Alangium chinense* (Lour.) Harms | Alangiaceae | T | 0.806 | 0.000 | 0.000 | 1.657 | 0.442 | 0.001 |
| 8 | T3 | *Albizia grandibracteata* Taub | Fabaceae | T | 0.000 | 0.000 | 0.000 | 0.771 | 0.334 | 0.002 |
| 9 | T12 | *Albizia gummifera* (J.F. Gmel.) C.A. Sm. | Fabaceae | T | 0.000 | 0.000 | 0.000 | 1.543 | 0.09 | 0.018 |
| 10 | T5 | *Albizia schimperiana* Oliv. | Fabaceae | T | 0.000 | 0.000 | 0.000 | 1.457 | 0.457 | 0.001 |
| 11 | H3 | *Alchemilla fischeri* Engl. | Rosaceae | H | 0.000 | 0.000 | 0.023 | 0.571 | 0.275 | 0.001 |
| 12 | T6 | *Allophylus abyssinicus* (Hochst.) Radlk. | Sapindaceae | T | 0.000 | 0.000 | 0.000 | 1.857 | 0.771 | 0.001 |
| 13 | T13 | *Allophylus macrobotrys* Gilg. | Sapindaceae | T | 0.139 | 0.840 | 0.159 | 0.000 | 0.207 | 0.002 |
| 14 | L10 | *Ampelocissus bombycian* (Bak) planch. | Vitaceae | L | 0.000 | 0.000 | 0.591 | 0.000 | 0.25 | 0.001 |
| 15 | T8 | *Antiaris toxicaria* Resch | Moraceae | T | 1.778 | 1.640 | **3.532** | 0.000 | 0.255 | 0.006 |
| 16 | T15 | *Apodytes dimidiata* E. Mey. ex Arn. | Icacinaceae | T | 2.222 | 2.000 | 1.364 | 0.000 | 0.234 | 0.002 |
| 17 | T10 | *Apodytes dimidiata* E. Mey. ex Arn. | Icacinaceae | T | 2.222 | 2.000 | 1.364 | 0.000 | 0.09 | 0.108 |
| 18 | S1 | *Argomullera macrophylla* Pax | Euphorbiaceae | S | 1.611 | 1.320 | 1.000 | 0.000 | 0.159 | 0.058 |
| 19 | HS1 | *Aspilia mossambicensis* (Oliv.) Wild | Asteraceae | H/S | 0.111 | 0.360 | 0.000 | 0.000 | 0.092 | 0.029 |
| 20 | H12 | *Asplenium aethopicum* (Brum.f.) bech. | Aspleniaceae | H | 0.000 | 0.000 | 0.545 | 0.000 | 0.182 | 0.001 |
| 21 | H5 | *Asplenium anisophyllum* Kunze | Aspleniaceae | H | 0.528 | 0.000 | 0.000 | 0.000 | 0.25 | 0.001 |
| 22 | H18 | *Asplenium bugoiense* Hieron | Aspleniaceae | H | 0.083 | 0.320 | 0.000 | 0.000 | 0.127 | 0.005 |
| 23 | H7 | *Asplenium erectum* Bory ex Willd. | Aspleniaceae | H | 0.000 | 0.000 | 0.023 | 0.143 | 0.293 | 0.007 |
| 24 | H8 | *Asplenium friesiorum* C.Chr. | Aspleniaceae | H | 0.000 | 0.000 | 0.023 | 0.371 | 0.242 | 0.001 |
| 25 | H9 | *Asplenium sandersonii* Hook | Aspleniaceae | H | 0.000 | 0.000 | 0.023 | 0.457 | 0.191 | 0.001 |
| 26 | T11 | *Baphia abyssinica* Brummit | Fabaceae | T | 0.091 | 0.153 | 0.000 | 0.000 | 0.191 | 0.005 |
| 27 | T4 | *Bersama abyssinica* Fresen | Melianthaceae | T | 0.236 | 0.000 | 0.079 | 0.000 | 0.129 | 0.003 |
| 28 | T7 | *Blighia unijugata* Bak. | Sapindaceae | T | **2.806** | 1.040 | 1.841 | 0.000 | 0.384 | 0.001 |
| 29 | H10 | *Bothriocline schimperi* Oliv. & Hiern ex Benth. | Asteraceae | H | 0.000 | 0.000 | 0.023 | 0.429 | 0.298 | 0.001 |
| 30 | ST1 | *Buddleja polystachya* Fresen. | Loganiaceae | S/T | 0.000 | 0.120 | 0.750 | 0.000 | 0.196 | 0.002 |
| 31 | ST2 | *Canthium oligocarpum* Hiern | Rubiaceae | S/T | 0.000 | 0.000 | 0.000 | 1.000 | 0.457 | 0.001 |
| 32 | S21 | *Capparis tomentosa* Lam. | Capparidaceae | S | 0.000 | 0.000 | 0.795 | 0.000 | 0.25 | 0.002 |
| 33 | ST3 | *Cassipourea malosana* (Baker) Alston | Rhizophoraceae | S/T | 0.000 | 0.000 | 0.000 | 1.371 | 0.343 | 0.001 |
| 34 | L2 | *Cayratia gracilis (*Guill. & Perr.) Suess. | Vitaceae | L | 0.000 | 0.040 | 0.159 | 0.000 | 0.109 | 0.022 |
| 35 | T31 | *Celtis africana* Burm.f. | Ulmaceae | T | 0.750 | 0.000 | 0.000 | 0.568 | 0.142 | 0.017 |
| 36 | T9 | *Celtis toka* (Forssk.)hepper.&.J.R.I.Wood | Ulmaceae | T | 1.417 | 1.200 | **2.909** | 0.000 | 0.268 | 0.005 |
| 37 | T40 | *Celtis zenkeri* (A.Rich) wedd | Urticeaceae | T | **3.450** | 3.120 | 3.659 | 0.000 | 0.307 | 0.005 |
| 38 | ST4 | *Clausena anisata* (Willd.) Hook.f.ex Benth. | Rutaceae | S/T | 0.000 | 0.000 | 0.000 | 1.829 | 0.657 | 0.001 |
| 39 | L3 | *Clematis longicauda* Steud. ex A. Rich. | Ranunculaceae | S | 0.000 | 0.000 | 0.023 | 0.429 | 0.217 | 0.001 |
| 40 | L4 | *Clematis simensis* Fresen. | Ranunculaceae | L | 0.000 | 0.000 | 0.023 | 0.971 | 0.279 | 0.001 |
| 41 | ST5 | *Coffea arabica* L. | Rubiaceae | S/T | 0.333 | 0.000 | 0.000 | 0.686 | 0.192 | 0.001 |
| 42 | T23 | *Combretum molle* R. Br. ex G. Don | Combretaceae | T | 1.389 | 0.600 | 0.432 | 0.000 | 0.191 | 0.005 |
| 43 | L12 | *Combretum paniculatum* Vent. | Combretaceae | L | 1.111 | 1.280 | 0.795 | 0.000 | 0.129 | 0.204 |
| 44 | T18 | *Cordia africana* Lam. | Boraginaceae | T | 0.000 | 1.106 | 0.193 | 0.019 | 0.196 | 0.004 |
| 45 | T22 | *Croton macrostachyus* Del. | Euphorbiaceae | T | 0.472 | 0.800 | 1.045 | 1.171 | 0.192 | 0.005 |
| 46 | T29 | *Croton sylvaticus* Hochst. & Krauss | Euphorbiaceae | T | 0.222 | 0.920 | 0.250 | 0.000 | 0.159 | 0.004 |
| 47 | L6 | *Culcasia falcifolia* Engl. | Araceae | L | 0.000 | 0.000 | 0.023 | 0.543 | 0.247 | 0.001 |
| 48 | T21 | *Cyathea manniana* Hook | Cyatheaceae | T | 0.000 | 0.000 | 0.000 | **3.414** | 1 | 0.001 |
| 49 | ST6 | *Dalbergia lactea* Vatke | Fabaceae | S/T | 0.000 | 0.000 | 0.023 | 0.000 | 0.471 | 0.001 |
| 50 | ST7 | *Deinbollia kilimandschrica* Taub | Sapindaceae | S/T | 0.250 | 1.040 | 1.045 | 0.000 | 0.196 | 0.012 |
| 51 | T19 | *Diospyros abyssinica* (Hiern) F.White | Ebenaceae | T | 1.556 | 0.800 | 1.955 | 0.000 | 0.227 | 0.004 |
| 52 | ST8 | *Dombeya torrida* (J.F.Gmel.) P. Bamps | Sterculiaceae | S/T | 0.000 | 0.120 | 0.545 | 0.000 | 0.149 | 0.005 |
| 53 | ST9 | *Dracaena afromontana* Mildbr. | Dracaenaceae | S/T | 0.000 | 0.000 | 0.000 | **3.514** | 1 | 0.001 |
| 54 | S6 | *Dracaena fragrans* (L.) Ker Gawl. | Dracaenaceae | S | 0.806 | 0.600 | 0.636 | 0.514 | 0.096 | 0.761 |
| 55 | T17 | *Dracaena reflexa* var. nitens auct. | Dracaenaceae | T | 0.000 | 0.000 | 0.000 | 1.657 | 0.6 | 0.001 |
| 56 | T24 | *Dracaena steudneri* Engler | Dracaenaceae | T | 0.139 | 0.520 | 0.682 | 1.400 | 0.292 | 0.002 |
| 57 | L24 | *Dregea schimperi* (Decne.) Bullock | Asclepiadaceae | L | 0.444 | 0.400 | 0.250 | 0.000 | 0.09 | 0.341 |
| 58 | T25 | *Ehretia cymosa* Thonn. | Boraginaceae | T | 0.000 | 0.000 | 0.000 | 1.229 | 0.571 | 0.001 |
| 59 | T26 | *Ekebergia capensis* Sparrm | Meliaceae | T | 0.000 | 0.000 | 0.000 | 1.657 | 0.686 | 0.001 |
| 60 | ST10 | *Elaeodendron buchananii* (Loes.) Loes. | Celastraceae | S/T | 0.000 | 0.000 | 0.000 | 1.657 | 0.629 | 0.001 |
| 61 | T27 | *Embelia schimperi* Vatke | Myrsinaceae | T | 1.278 | 1.000 | 0.955 | 0.000 | 0.143 | 0.142 |
| 62 | S7 | *Erythrococca trichogyne* (Müll.Arg.) Prain | Euphorbiaceae | S | 1.361 | 2.040 | 0.750 | 0.943 | 0.208 | 0.065 |
| 63 | S11 | *Erythrococca trichogyne* (Muell. Arg.) Prain | Euphorbiaceae | S | 0.861 | 0.000 | 0.000 | 0.000 | 0.302 | 0.045 |
| 64 | ST11 | *Erythroxylum fischeri*Engl. | [Erythroxylaceae](https://en.wikipedia.org/wiki/Erythroxylaceae) | S/T | 0.000 | 0.000 | 0.000 | 0.886 | 0.25 | 0.001 |
| 65 | T28 | *Euphorbia ampliphylla* Pax | Euphorbiaceae | T | 0.139 | 0.720 | 0.159 | 1.343 | 0.429 | 0.001 |
| 66 | T20 | *Fagaropsis angolensis* (Engl.) Dale | Rutaceae | T | 0.000 | 0.000 | 0.000 | **3.514** | 0.309 | 0.001 |
| 67 | T30 | *Ficus exasperata* Vahl | Moraceae | T | 1.000 | 1.760 | 0.364 | 0.000 | 0.293 | 0.001 |
| 68 | T63 | *Ficus mucuso* (Ficatho) | [Moraceae](https://en.wikipedia.org/wiki/Moraceae) | T | 1.000 | 1.160 | 0.955 | 0.000 | 0.164 | 0.051 |
| 69 | T32 | *Ficus ovate* Vahl | Moraceae | T | 0.222 | 1.240 | 0.818 | 0.000 | 0.218 | 0.003 |
| 70 | T43 | *Ficus sur* Forssk | Moraceae | T | 0.222 | 1.520 | 1.136 | 0.943 | 0.223 | 0.008 |
| 71 | T42 | *Ficus thonningii* Blume | Moraceae | T | 0.444 | 0.000 | 0.000 | 0.000 | 0.194 | 0.001 |
| 72 | T35 | *Ficus umbellata* Vahl | Moraceae | T | 0.833 | 0.920 | 0.136 | 0.000 | 0.136 | 0.029 |
| 73 | T36 | *Galiniera saxifraga* (Hochst.) Bridson | Rubiaceae | T | 0.000 | 0.000 | 0.000 | 2.600 | 0.743 | 0.001 |
| 74 | ST12 | *Garcinia buchananii* Baker | Clusiaceae | S/T | 0.806 | 0.000 | 0.000 | 0.000 | 0.306 | 0.001 |
| 75 | T37 | *Goupia glabra* Aubl. | [Goupiaceae](https://en.wikipedia.org/wiki/Goupiaceae) | T | 0.194 | 0.000 | 0.000 | 0.000 | 0.194 | 0.002 |
| 76 | ST13 | *Grewia mollis* A. Juss. | Tiliaceae | S/T | 1.222 | 1.400 | 1.159 | 0.000 | 0.148 | 0.124 |
| 77 | L15 | *Hippocratea africana* (Willd.) Loes. | Celasteraceae | L | 0.028 | 0.200 | 0.045 | 0.000 | 0.146 | 0.003 |
| 78 | L9 | *Hippocratea goetzei* Loes. | Celasteraceae | L | 0.038 | 0.200 | 0.055 | 0.000 | 0.132 | 0.002 |
| 79 | L1 | *Hippocratea pallens* Planch. ex Oliv. | Celastraceae | L | 0.000 | 0.000 | 0.023 | 0.314 | 0.187 | 0.001 |
| 80 | T38 | *Ilex mitis (L.)* Radlk. | Aquifoliaceae | T | 0.000 | 0.000 | 0.000 | 1.657 | 0.8 | 0.001 |
| 81 | H1 | *Impatiens sp.* | Balsaminaceae | H | 0.000 | 0.000 | 0.023 | 0.171 | 0.151 | 0.006 |
| 82 | L11 | *Jasminum abyssinicum* Hochst. ex DC. | Oleaceae | L | 0.000 | 0.000 | 0.000 | 0.457 | 0.286 | 0.001 |
| 83 | L5 | *Jasminum dichotomum* Vahl. | Oleaceae | L | 0.111 | 1.080 | 1.023 | 0.000 | 0.156 | 0.017 |
| 84 | S19 | *Justicia schimperiana* (Hochst. ex Nees) T. Anders | Acanthaceae | S | 0.000 | 0.000 | 0.023 | 0.514 | 0.246 | 0.001 |
| 85 | S2 | *Justicia sp.* | Acanthaceae | S | 0.000 | 0.000 | 0.023 | 0.286 | 0.389 | 0.002 |
| 86 | L13 | *Lagenaria siceraria* | Cucurbitaceae | L | 0.000 | 0.040 | 0.341 | 0.000 | 0.159 | 0.004 |
| 87 | L14 | *Landolphia buchananii* (Hallier f.) Stapf. | Apocynaceae | L | 0.389 | 0.600 | 0.114 | 0.514 | 0.1 | 0.306 |
| 88 | L8 | *Landolphia eminiana*Hallier f. | Apocynaceae | L | 0.000 | 0.040 | 0.273 | 0.000 | 0.159 | 0.003 |
| 89 | T39 | *Lannea welwitschii* (Hiern) Engl. | Anacardiaceae | T | 1.500 | 1.600 | 1.409 | 0.000 | 0.241 | 0.006 |
| 90 | T16 | *Lecaniodiscus fraxinifolius* Bak. | Sapindaceae | T | 1.472 | **3.220** | 1.955 | 0.000 | 0.343 | 0.001 |
| 91 | T50 | *Lepidotrichilia volkensii* (Gürke) Leroy | Meliaceae | T | 0.000 | 0.000 | 0.000 | 0.657 | 0.371 | 0.001 |
| 92 | T34 | *Lepisnthes senegalensis* (Juss.ex.poir) Leenh | Sapotaceae | T | 0.000 | 0.000 | 0.727 | 0.000 | 0.25 | 0.001 |
| 93 | H4 | *Leptaspis zeylanica* Nees ex Steud. | Poaceae | H | 1.139 | 0.520 | 0.705 | 0.000 | 0.134 | 0.079 |
| 94 | T33 | *Macaranga capensis* (Baill.) Sim | Euphorbiaceae | T | 0.000 | 0.000 | 0.000 | 0.771 | 0.229 | 0.001 |
| 95 | ST14 | *Maesa lanceolata* Forssk. | Myrsinaceae | S/T | 0.000 | 0.000 | 0.023 | 0.286 | 0.159 | 0.003 |
| 96 | T44 | *Mallotus oppositifolius* (Geiseler) Mull | Euphorbiaceae | T | 1.111 | 0.640 | 0.795 | 0.000 | 0.109 | 0.144 |
| 97 | T49 | *Manilkara butugi* Chiov | Sapotaceae | T | 1.000 | 0.000 | 0.477 | 0.000 | 0.226 | 0.001 |
| 98 | H13 | *Marantochloa leucantha* (K. Schum.) Milne-Redh. | Marantaceae | H | 0.000 | 0.000 | 0.341 | 0.000 | 0.205 | 0.001 |
| 99 | T46 | *Margaritaria discoidea* (Baill.) Webster | Euphorbiaceae | T | 1.694 | 0.640 | 0.818 | 0.000 | 0.314 | 0.001 |
| 100 | S8 | *Maytenus gracilipes* (Welw. ex Oliv.) Exell | Celastraceae | S | 0.000 | 0.000 | 0.023 | 0.257 | 0.184 | 0.001 |
| 101 | ST15 | *Maytenus undata* (Thunb.) Blakelock | Celastraceae | S/T | 1.222 | 1.160 | 0.795 | 0.000 | 0.128 | 0.185 |
| 102 | T47 | *Millettia ferruginea* (Hochst.) Bak. | Fabaceae | T | 0.889 | 0.880 | 0.182 | 0.714 | 0.092 | 0.47 |
| 103 | T48 | *Mimusops lanceolata* A.DC | Sapotaceae | T | 1.139 | 0.400 | 0.682 | 0.000 | 0.199 | 0.006 |
| 104 | T56 | *Morus mesozygia* Stapf. | Moraceae | T | 0.556 | 0.480 | 1.477 | 0.000 | 0.307 | 0.001 |
| 105 | ST16 | *Olea capensis* L. | Oleaceae | S/T | 0.167 | 0.480 | 0.500 | 0.000 | 0.089 | 0.155 |
| 106 | T41 | *Olea welwitschii* (Knobl.) Gilg & Schellenb. | Oleaceae | T | 0.000 | 0.000 | 0.000 | 1.314 | 0.571 | 0.001 |
| 107 | S11 | *Oxyanthus speciosus* DC | Rubiaceae | S | 0.056 | 0.640 | 0.273 | 0.000 | 0.159 | 0.005 |
| 108 | L18 | *Paullinia pinnata* L. | Sapindaceae | L | 0.000 | 0.040 | 0.455 | 0.000 | 0.209 | 0.001 |
| 109 | S13 | *Pentas schimperiana* (A. Rich.) Vatke | Rubiaceae | S | 0.000 | 0.000 | 0.000 | 0.771 | 0.257 | 0.001 |
| 110 | L17 | *Peponium vogelii* (Hook.f.) Engl. | Cucurbitaceae | L | 0.000 | 0.120 | 0.636 | 0.000 | 0.153 | 0.004 |
| 111 | T51 | *Phoenix reclinata* Jacq. | Araliaceae | T | 0.000 | 0.000 | 0.000 | 0.743 | 0.257 | 0.001 |
| 112 | S14 | *Phyllanthus reticulatus* Poir. | Phyllanthaceae | S | 0.778 | 0.000 | 0.000 | 0.000 | 0.25 | 0.001 |
| 113 | H14 | *Physalis angulata* | [Solanaceae.](https://en.wikipedia.org/wiki/Solanaceae) | H | 0.000 | 0.000 | 0.000 | 1.543 | 0.743 | 0.001 |
| 114 | L16 | *Phytolacca dodecandra* L 'Herit. | Phytolaccaceae | L | 0.083 | 0.640 | 0.500 | 0.000 | 0.13 | 0.054 |
| 115 | H15 | *Pilea bambuseti* Engl. | Urticaceae | H | 0.000 | 0.000 | 0.045 | 0.457 | 0.208 | 0.001 |
| 116 | S23 | *Piper capense* L.f | Piperaceae | S | 0.556 | 0.160 | 0.000 | 0.000 | 0.212 | 0.001 |
| 117 | T57 | *Pittosporum* viridiflorum Sims | Pittosporaceae | T | 0.667 | 0.840 | 0.341 | 0.429 | 0.28 | 0.001 |
| 118 | H16 | *Plectranthus sp.* | Lamiaceae | H | 0.000 | 0.120 | 0.545 | 0.000 | 0.205 | 0.001 |
| 119 | H17 | *Pollia condensata* C B. Clarke | Commelinaceae | H | 0.472 | 0.000 | 0.000 | 0.000 | 0.194 | 0.001 |
| 120 | T2 | *Polyscias fulva* (Hiern) Harms | Araliaceae | T | 0.083 | 0.360 | 0.068 | 1.371 | 0.541 | 0.001 |
| 121 | T54 | *Pouteria adolfi-friederici* (Engl.) Baehni | Sapotaceae | T | 0.000 | 0.000 | 0.000 | 1.829 | 0.8 | 0.001 |
| 122 | T55 | *Pouteria alnifolia* (Bak.) Roberty | Sapotaceae | T | 2.222 | 1.240 | 1.000 | 0.000 | 0.332 | 0.001 |
| 123 | T45 | *Pouteria altissima* (A.Chev.) Baehni | Sapotaceae | T | 2.472 | **3.400** | 2.864 | 0.000 | 0.389 | 0.001 |
| 124 | T52 | *Prunus africana* (Hook.f.) Kalkman | Rosaceae | T | 0.000 | 0.000 | 0.000 | 0.800 | 0.657 | 0.001 |
| 125 | H6 | *Pseuderanthemum tunicatum* (Afzel.) Milne-Redh. | Acanthaceae | H | 0.111 | 0.440 | 0.114 | 0.000 | 0.159 | 0.003 |
| 126 | H19 | *Pseuderanthemum tunicatum* (Afzel.) Milne-Redh. | Acanthaceae | H | 0.111 | 0.440 | 0.114 | 0.000 | 0.206 | 0.002 |
| 127 | ST17 | *Psychotria orophila* Petit | Rubiaceae | S/T | 0.000 | 0.000 | 0.000 | 0.714 | 0.143 | 0.001 |
| 128 | S16 | *Pycnostachys eminii* Gurke | Lamiaceae | S | 0.000 | 0.000 | 0.000 | 1.714 | 0.543 | 0.001 |
| 129 | S22 | *Rinorea friisii* M.G.Gilbert | Violaceae | S | 0.278 | 1.000 | 0.545 | 0.000 | 0.219 | 0.001 |
| 130 | ST18 | *Rinorea ilicifolia* (Welw.ex Oliv.) Kuntze | Violaceae | S/T | 0.044 | 1.640 | 1.327 | 0.000 | 0.135 | 0.001 |
| 131 | T62 | *Ritchiea albersii* Gilg | Capparidaceae | T | 0.944 | 1.840 | 1.227 | 0.000 | 0.275 | 0.001 |
| 132 | ST19 | *Rothmannia urceliformis* (Hiern) Bullock ex Robyns | Rubiaceae | S/T | 0.111 | 0.480 | 0.068 | 1.314 | 0.381 | 0.001 |
| 133 | L21 | *Rubus apetalus* Poir. | Rosaceae | L | 0.000 | 0.000 | 0.023 | 0.171 | 0.126 | 0.005 |
| 134 | L20 | *Saba comorensis* (Boj.) Pichon | Apocynaceae | L | 0.028 | 0.560 | 0.091 | 0.000 | 0.231 | 0.001 |
| 135 | T59 | *Schefflera abyssinica* (Hochst. ex A. Rich.) Harms | Araliaceae | T | 0.000 | 0.000 | 0.000 | 2.800 | 0.886 | 0.001 |
| 136 | L19 | *Schefflera myriantha* (Bak) Drake | Araliaceae | L | 0.000 | 0.000 | 0.000 | 1.914 | 0.629 | 0.001 |
| 137 | L22 | *Sericostachys scandens* Gilg & Lopr. | Amaranthaceae | L | 0.000 | 0.080 | 0.545 | 0.000 | 0.238 | 0.001 |
| 138 | H20 | *Setaria megaphylla* (Steud.) Th. Dur. & Schinz | Poaceae | H | 0.000 | 0.000 | 0.023 | 0.371 | 0.296 | 0.001 |
| 139 | ST20 | *Solanecio mannii* (Hook. F.) C. Jeffrey | Asteraceae | S/T | 0.000 | 0.000 | 0.000 | 1.200 | 0.343 | 0.001 |
| 140 | H21 | *Solanum nigrum* L. | Solanaceae | H | 0.000 | 0.040 | 0.341 | 0.000 | 0.203 | 0.001 |
| 141 | H22 | *Symphytum officinale* | [Boraginaceae](https://en.wikipedia.org/wiki/Boraginaceae) | H | 0.083 | 0.520 | 0.023 | 0.000 | 0.233 | 0.001 |
| 142 | L23 | *Tacazzea apiculata* Oliv | Asclepiadaceae | L | 0.000 | 0.200 | 0.500 | 0.000 | 0.179 | 0.002 |
| 143 | L7 | *Tacazzea conferta* N.E. Br. | Asclepiadaceae | L | 0.000 | 0.000 | 0.045 | 0.600 | 0.266 | 0.001 |
| 144 | ST21 | *Teclea nobilis* Del. | Rutaceae | S/T | 0.944 | 0.080 | 0.591 | 0.000 | 0.211 | 0.001 |
| 145 | L27 | *Tiliacora funifera* (Miers) Oliv. | Menispermaceae | L | 0.694 | 0.280 | 0.432 | 0.000 | 0.137 | 0.048 |
| 146 | L25 | *Tiliacora troupinii* Cuf. | Menispermaceae | L | 0.564 | 0.300 | 0.232 | 0.000 | 0.234 | 0.031 |
| 147 | T1 | *Trema orientalis* (L.) Bl. | Ulmaceae | T | 0.000 | 0.000 | 0.000 | 0.771 | 0.371 | 0.001 |
| 148 | T61 | *Trichilia prieuriana* A.juss | Meliaceae | T | 1.694 | 1.200 | 0.864 | 0.000 | 0.188 | 0.019 |
| 149 | T58 | *Trilepisium madagascariense* DC | Moraceae | T | 0.000 | 0.000 | 0.000 | 2.686 | 0.714 | 0.001 |
| 150 | S18 | *Triumfetta tomentosa* Boj. | Tiliaceae | S | 0.000 | 0.000 | 0.000 | 1.771 | 0.6 | 0.001 |
| 151 | L28 | *Uncaria africana* G. Don | Rubiaceae | L | 0.056 | 0.400 | 0.114 | 0.000 | 0.197 | 0.001 |
| 152 | L26 | *Urera hypselodendron* (Hochst. ex A. Rich.) Wedd. | Urticaceae | L | 0.046 | 0.300 | 0.011 | 0.000 | 0.152 | 0.001 |
| 153 | T14 | *Vepris dainellii* (Pic. Serm.) Kokwaro | Rutaceae | T | 0.000 | 0.000 | 0.000 | 1.286 | 0.429 | 0.001 |
| 154 | S9 | *Vernonia amygdalina* Del. | Asteraceae | S | 0.250 | 1.200 | 0.955 | 0.000 | 0.18 | 0.009 |
| 155 | S20 | *Vernonia auriculifera* Hiern | Asteraceae | S | 0.861 | 0.840 | 0.523 | 0.371 | 0.296 | 0.001 |
| 156 | S5 | *Vernonia bipotini* Vatke | Asteraceae | S | 0.000 | 0.000 | 0.023 | 0.371 | 0.914 | 0.001 |
| 157 | S17 | *Vernonia hochstetteri* Sch.Bip.ex.Walp | Asteraceae | S | 0.000 | 0.160 | 0.636 | 0.000 | 0.272 | 0.001 |
| 158 | S15 | *Whitfieldia elongata* (P. Beauv.) De Wild. & Th. Dur | Acanthaceae | S | 0.944 | 0.760 | 0.636 | 0.000 | 0.146 | 0.074 |

**Note:** GH = Growth Habit, T = Tree, S = Shrub, S/T = Shrub/Tree, H = Herb, and L = Liana, PC = Preservation Code and SF1 = Supplement File

**Appendix 2**: Environmental factors data in MFBR

| Plot No | Hi | Elevation | Slope | Aspect | MC | pH | Sand | Silt | Clay | TN | OM | P |
| --- | --- | --- | --- | --- | --- | --- | --- | --- | --- | --- | --- | --- |
| 1 | 6 | 1200 | 6.3 | 3.30 | 32.6 | 6.3 | 33.0 | 33.0 | 34.0 | 0.33 | 10.05 | 22.78 |
| 2 | 4 | 870 | 3.4 | 2.50 | 32.6 | 6.9 | 28.0 | 34.0 | 38.0 | 0.42 | 11.32 | 12.07 |
| 3 | 5 | 950 | 5.5 | 1.25 | 19.0 | 6.8 | 27.0 | 35.0 | 38.0 | 0.25 | 13.00 | 16.21 |
| 4 | 7 | 970 | 2.4 | 1.25 | 10.3 | 6.8 | 30.0 | 34.0 | 36.0 | 0.22 | 10.76 | 15.42 |
| 5 | 5 | 1200 | 4.8 | 3.00 | 16.7 | 6.2 | 33.0 | 33.0 | 34.0 | 0.41 | 9.56 | 15.54 |
| 6 | 10 | 860 | 7.1 | 1.25 | 8.7 | 5.1 | 28.5 | 34.5 | 37.0 | 0.42 | 16.38 | 17.35 |
| 7 | 6 | 840 | 4.5 | 2.50 | 11.9 | 6.9 | 30.0 | 33.0 | 37.0 | 0.42 | 15.68 | 16.48 |
| 8 | 5 | 1100 | 3.5 | 4.00 | 12.8 | 6.4 | 34.0 | 33.0 | 33.0 | 0.31 | 14.32 | 15.1 |
| 9 | 10 | 1150 | 3.2 | 2.50 | 14.9 | 6.4 | 30.0 | 33.0 | 37.0 | 0.35 | 13.70 | 23.53 |
| 10 | 9 | 1000 | 5.4 | 3.30 | 30.4 | 6.4 | 30.0 | 34.0 | 36.0 | 0.45 | 15.00 | 17.56 |
| 11 | 4 | 980 | 14.3 | 3.25 | 27.7 | 6.8 | 29.0 | 34.0 | 37.0 | 0.15 | 18.50 | 3.64 |
| 12 | 6 | 1180 | 4.3 | 3.25 | 19.0 | 5.6 | 29.0 | 33.0 | 38.0 | 0.35 | 16.35 | 7.34 |
| 13 | 7 | 880 | 2.3 | 2.50 | 18.1 | 5.1 | 28.5 | 34.5 | 37.0 | 0.22 | 17.37 | 20.81 |
| 14 | 11 | 862 | 4.5 | 2.50 | 22.4 | 6.8 | 31.0 | 34.0 | 35.0 | 0.45 | 21.00 | 14.78 |
| 15 | 8 | 1190 | 3.2 | 4.00 | 15.8 | 6.5 | 31.0 | 32.0 | 37.0 | 0.24 | 15.75 | 16.58 |
| 16 | 8 | 1995 | 2.6 | 4.00 | 17.2 | 6.1 | 42.0 | 28.0 | 30.0 | 0.46 | 14.21 | 20.65 |
| 17 | 7 | 830 | 5.4 | 2.00 | 14.1 | 6.9 | 30.0 | 34.0 | 36.0 | 0.12 | 16.12 | 16.58 |
| 18 | 3 | 965 | 6.3 | 1.25 | 18.1 | 6.8 | 27.0 | 35.0 | 38.0 | 0.25 | 22.20 | 12.36 |
| 19 | 4 | 865 | 6.3 | 1.00 | 12.8 | 6.9 | 30.0 | 33.0 | 37.0 | 0.42 | 17.60 | 24.35 |
| 20 | 5 | 950 | 6.3 | 0.00 | 10.7 | 6.8 | 28.0 | 35.0 | 37.0 | 0.22 | 17.65 | 17.84 |
| 21 | 6 | 1287 | 3.5 | 2.00 | 30.4 | 6.4 | 32.0 | 33.0 | 35.0 | 0.35 | 15.59 | 1.38 |
| 22 | 3 | 850 | 3.2 | 3.00 | 27.7 | 6.9 | 29.0 | 34.0 | 37.0 | 0.32 | 15.21 | 15.35 |
| 23 | 3 | 1100 | 5.6 | 2.00 | 19.0 | 6.6 | 31.0 | 32.0 | 37.0 | 0.34 | 18.15 | 10.81 |
| 24 | 3 | 1170 | 6.4 | 2.50 | 18.1 | 6.5 | 32.0 | 32.5 | 35.5 | 0.41 | 14.21 | 8.54 |
| 25 | 6 | 800 | 8.3 | 1.25 | 22.4 | 6.9 | 29.0 | 34.0 | 37.0 | 0.33 | 17.21 | 13 |
| 26 | 4 | 1197 | 7.3 | 4.00 | 15.8 | 6.4 | 31.0 | 33.0 | 36.0 | 0.34 | 15.08 | 2.15 |
| 27 | 5 | 850 | 5.3 | 3.25 | 17.2 | 6.8 | 28.5 | 34.5 | 37.0 | 0.32 | 19.12 | 26.5 |
| 28 | 3 | 1080 | 4.5 | 4.00 | 14.1 | 6.6 | 30.0 | 34.0 | 36.0 | 0.35 | 15.51 | 11.91 |
| 29 | 6 | 890 | 7.2 | 2.50 | 18.1 | 5.8 | 28.0 | 34.0 | 38.0 | 0.42 | 20.78 | 22.25 |
| 30 | 7 | 1200 | 7.6 | 4.00 | 12.8 | 6.4 | 30.0 | 34.0 | 36.0 | 0.33 | 15.21 | 13.57 |
| 31 | 6 | 1500 | 7.3 | 4.00 | 10.7 | 6.3 | 36.0 | 31.0 | 33.0 | 0.42 | 13.30 | 24.14 |
| 32 | 4 | 1270 | 4.4 | 0.00 | 11.5 | 6.5 | 29.0 | 34.0 | 37.0 | 0.31 | 13.00 | 20.54 |
| 33 | 5 | 1450 | 6.5 | 4.00 | 7.1 | 6.1 | 30.0 | 34.0 | 36.0 | 0.35 | 16.20 | 26.58 |
| 34 | 7 | 1270 | 2.4 | 1.25 | 22.4 | 6.4 | 28.5 | 35.5 | 36.0 | 0.33 | 17.50 | 21 |
| 35 | 5 | 1480 | 3.8 | 2.50 | 35.1 | 5.4 | 35.0 | 31.0 | 34.0 | 0.34 | 20.03 | 26.28 |
| 36 | 10 | 1456 | 8.1 | 1.00 | 17.6 | 6.4 | 32.0 | 33.0 | 35.0 | 0.31 | 16.98 | 26.71 |
| 37 | 6 | 1240 | 7.5 | 2.50 | 22.4 | 6.4 | 29.0 | 34.0 | 37.0 | 0.43 | 18.96 | 16.41 |
| 38 | 5 | 1380 | 2.5 | 3.00 | 33.3 | 6.4 | 33.0 | 32.0 | 35.0 | 0.22 | 20.05 | 26.15 |
| 39 | 10 | 1250 | 2.2 | 3.00 | 11.1 | 6.4 | 28.5 | 35.5 | 36.0 | 0.33 | 14.50 | 23.16 |
| 40 | 9 | 1400 | 6.4 | 2.50 | 7.9 | 6.4 | 35.0 | 31.0 | 34.0 | 0.31 | 15.53 | 8.65 |
| 41 | 4 | 1380 | 11.3 | 0.00 | 20.0 | 6.6 | 29.0 | 35.0 | 36.0 | 0.15 | 15.45 | 3.84 |
| 42 | 6 | 1480 | 5.3 | 1.00 | 33.3 | 6.4 | 36.0 | 32.0 | 32.0 | 0.32 | 14.85 | 25.5 |
| 43 | 7 | 1465 | 1.3 | 2.50 | 14.9 | 6.4 | 30.0 | 33.0 | 37.0 | 0.31 | 15.32 | 10.12 |
| 44 | 11 | 1262 | 5.5 | 3.00 | 21.5 | 6.6 | 28.5 | 35.5 | 36.0 | 0.33 | 17.56 | 20.65 |
| 45 | 8 | 1490 | 2.2 | 3.30 | 27.7 | 6.3 | 33.0 | 32.0 | 35.0 | 0.41 | 14.41 | 13.63 |
| 46 | 8 | 1265 | 1.6 | 1.00 | 26.1 | 6.5 | 28.5 | 35.5 | 36.0 | 0.43 | 15.00 | 24.6 |
| 47 | 7 | 1385 | 6.4 | 1.00 | 10.3 | 6.5 | 29.0 | 34.0 | 37.0 | 0.33 | 15.56 | 16.34 |
| 48 | 3 | 1200 | 5.3 | 0.00 | 9.1 | 6.5 | 29.0 | 35.0 | 36.0 | 0.43 | 13.65 | 23.91 |
| 49 | 4 | 1465 | 5.3 | 1.25 | 18.1 | 6.3 | 35.0 | 32.0 | 33.0 | 0.32 | 14.86 | 20.31 |
| 50 | 5 | 1450 | 7.3 | 2.50 | 30.4 | 6.5 | 36.0 | 31.0 | 33.0 | 0.25 | 16.00 | 13.53 |
| 51 | 6 | 1200 | 4.5 | 4.00 | 14.1 | 6.5 | 29.0 | 34.0 | 37.0 | 0.33 | 14.85 | 11.61 |
| 52 | 3 | 1350 | 2.2 | 4.00 | 22.4 | 6.4 | 29.0 | 33.0 | 38.0 | 0.25 | 13.74 | 40.21 |
| 53 | 3 | 1330 | 6.6 | 1.00 | 28.8 | 6.5 | 34.0 | 33.0 | 33.0 | 0.33 | 17.10 | 15.16 |
| 54 | 3 | 1415 | 5.4 | 3.00 | 20.0 | 6.2 | 36.0 | 30.0 | 34.0 | 0.31 | 16.12 | 26.35 |
| 55 | 6 | 1215 | 6.3 | 0.00 | 26.6 | 6.5 | 29.0 | 34.0 | 37.0 | 0.33 | 12.68 | 20.35 |
| 56 | 4 | 1254 | 8.3 | 1.30 | 35.1 | 6.6 | 31.0 | 33.0 | 36.0 | 0.34 | 15.78 | 16.91 |
| 57 | 5 | 1250 | 7.3 | 2.00 | 17.6 | 6.6 | 29.0 | 35.0 | 36.0 | 0.43 | 15.58 | 22.81 |
| 58 | 3 | 1380 | 7.5 | 3.25 | 22.4 | 6.6 | 35.0 | 32.0 | 33.0 | 0.33 | 16.10 | 6.26 |
| 59 | 6 | 1490 | 2.2 | 3.00 | 33.3 | 6.4 | 31.0 | 34.0 | 35.0 | 0.25 | 18.30 | 11.6 |
| 60 | 7 | 1530 | 8.6 | 4.00 | 14.9 | 6.4 | 31.5 | 34.5 | 34.0 | 0.32 | 16.54 | 9.38 |
| 61 | 6 | 1500 | 9.3 | 1.30 | 31.6 | 6.4 | 36.0 | 31.0 | 33.0 | 0.12 | 18.65 | 4.31 |
| 62 | 4 | 1570 | 2.4 | 2.50 | 27.7 | 5.9 | 32.0 | 33.0 | 35.0 | 0.41 | 16.89 | 11.51 |
| 63 | 5 | 1550 | 6.5 | 1.00 | 33.3 | 6.24 | 36.0 | 31.0 | 33.0 | 0.41 | 18.21 | 33.51 |
| 64 | 7 | 1570 | 5.4 | 0.00 | 37.0 | 6.4 | 32.0 | 33.0 | 35.0 | 0.21 | 21.02 | 21.54 |
| 65 | 5 | 1800 | 6.8 | 0.00 | 40.8 | 5.6 | 40.0 | 28.0 | 32.0 | 0.47 | 18.46 | 30.64 |
| 66 | 10 | 1760 | 9.1 | 3.30 | 13.2 | 5.8 | 37.0 | 31.0 | 32.0 | 0.28 | 22.15 | 27.5 |
| 67 | 7 | 1740 | 2.5 | 2.00 | 28.8 | 5.8 | 38.0 | 30.0 | 32.0 | 0.19 | 14.15 | 23.46 |
| 68 | 9 | 1500 | 2.5 | 2.50 | 22.4 | 6.5 | 33.0 | 33.0 | 34.0 | 0.22 | 17.80 | 12.15 |
| 69 | 4 | 1550 | 1.2 | 3.25 | 35.7 | 6.4 | 34.0 | 32.0 | 34.0 | 0.2 | 18.50 | 26.02 |
| 70 | 10 | 1500 | 6.4 | 1.25 | 33.3 | 6.4 | 35.0 | 32.0 | 33.0 | 0.33 | 17.58 | 20.35 |
| 71 | 4 | 1680 | 11.3 | 3.00 | 33.3 | 6.2 | 38.0 | 29.0 | 33.0 | 0.11 | 15.01 | 9.57 |
| 72 | 10 | 1780 | 2.3 | 2.00 | 37.0 | 5.9 | 40.0 | 28.0 | 32.0 | 0.28 | 15.18 | 30.12 |
| 73 | 8 | 1780 | 1.3 | 0.00 | 14.9 | 5.9 | 38.0 | 30.0 | 32.0 | 0.21 | 14.56 | 16.48 |
| 74 | 4 | 1562 | 5.5 | 0.00 | 24.0 | 6.4 | 35.5 | 31.0 | 33.5 | 0.42 | 13.15 | 15.15 |
| 75 | 3 | 1790 | 5.2 | 3.25 | 19.5 | 5.9 | 39.0 | 29.0 | 32.0 | 0.38 | 15.31 | 25.59 |
| 76 | 8 | 1595 | 1.6 | 1.25 | 14.9 | 6.3 | 32.0 | 33.0 | 35.0 | 0.31 | 17.32 | 15.28 |
| 77 | 4 | 1520 | 3.4 | 2.00 | 31.6 | 6.4 | 32.5 | 33.0 | 34.5 | 0.32 | 18.35 | 1.54 |
| 78 | 8 | 1665 | 8.3 | 3.00 | 27.7 | 6.3 | 38.0 | 29.0 | 33.0 | 0.15 | 17.12 | 11.24 |
| 79 | 10 | 1865 | 8.3 | 3.00 | 33.3 | 5.8 | 44.0 | 28.0 | 28.0 | 0.27 | 18.32 | 22.16 |
| 80 | 9 | 1650 | 8.3 | 1.25 | 37.0 | 6.1 | 42.0 | 28.0 | 30.0 | 0.22 | 17.00 | 14.88 |
| 81 | 3 | 1525 | 5.5 | 4.00 | 40.8 | 6.4 | 31.0 | 34.0 | 35.0 | 0.22 | 15.12 | 6.92 |
| 82 | 10 | 1850 | 5.2 | 4.00 | 13.2 | 5.7 | 41.0 | 28.0 | 31.0 | 0.36 | 17.56 | 31 |
| 83 | 9 | 1550 | 3.6 | 3.00 | 28.8 | 5.7 | 30.5 | 32.5 | 37.0 | 0.39 | 16.78 | 26.36 |
| 84 | 10 | 1520 | 8.4 | 2.50 | 22.4 | 6.3 | 32.0 | 33.0 | 35.0 | 0.22 | 16.95 | 0.9 |
| 85 | 8 | 1524 | 3.3 | 2.00 | 35.7 | 6.4 | 31.0 | 34.0 | 35.0 | 0.33 | 20.26 | 27.38 |
| 86 | 4 | 1800 | 9.3 | 1.30 | 33.3 | 6.6 | 41.0 | 28.0 | 31.0 | 0.37 | 18.21 | 17.78 |
| 87 | 5 | 1875 | 8.3 | 3.25 | 42.8 | 6.7 | 44.0 | 28.0 | 28.0 | 0.27 | 16.23 | 3.75 |
| 88 | 10 | 1850 | 8.5 | 4.00 | 15.2 | 5.9 | 42.0 | 28.0 | 30.0 | 0.37 | 18.19 | 17.57 |
| 89 | 9 | 1853 | 5.2 | 2.50 | 30.8 | 5.8 | 44.0 | 26.0 | 30.0 | 0.37 | 15.26 | 6.38 |
| 90 | 6 | 1785 | 9.6 | 2.50 | 24.4 | 6.3 | 40.0 | 28.0 | 32.0 | 0.38 | 18.96 | 11.24 |
| 91 | 10 | 2110 | 1.2 | 2.50 | 37.6 | 5.5 | 46.0 | 24.0 | 30.0 | 0.22 | 15.00 | 12 |
| 92 | 5 | 2310 | 3.4 | 2.50 | 35.3 | 5.5 | 46.0 | 24.0 | 30.0 | 0.41 | 15.85 | 4.59 |
| 93 | 3 | 2300 | 11.3 | 4.00 | 36.3 | 5.4 | 45.0 | 26.0 | 29.0 | 0.21 | 16.24 | 8.26 |
| 94 | 10 | 1865 | 2.3 | 4.00 | 39.0 | 5.8 | 40.2 | 28.8 | 31.0 | 0.28 | 18.21 | 11.93 |
| 95 | 9 | 1845 | 4.3 | 4.00 | 16.9 | 6.5 | 40.0 | 28.0 | 32.0 | 0.27 | 15.89 | 12.46 |
| 96 | 5 | 2250 | 6.5 | 0.00 | 26.0 | 5.4 | 47.0 | 25.0 | 28.0 | 0.22 | 18.25 | 16.48 |
| 97 | 4 | 1896 | 5.2 | 2.50 | 21.8 | 5.7 | 41.0 | 28.0 | 31.0 | 0.18 | 17.45 | 22.14 |
| 98 | 4 | 1826 | 6.6 | 2.00 | 17.9 | 6.6 | 42.0 | 28.0 | 30.0 | 0.33 | 15.91 | 30.26 |
| 99 | 7 | 1830 | 7.4 | 3.00 | 35.6 | 5.6 | 45.0 | 27.0 | 28.0 | 0.48 | 21.00 | 26.35 |
| 100 | 8 | 1821 | 8.3 | 4.00 | 30.7 | 6.7 | 44.0 | 28.0 | 28.0 | 0.18 | 18.46 | 33.12 |
| 101 | 4 | 2000 | 8.3 | 2.00 | 35.3 | 6.1 | 46.0 | 26.0 | 28.0 | 0.32 | 25.12 | 36.84 |
| 102 | 5 | 2200 | 8.3 | 4.00 | 41.0 | 5.5 | 46.0 | 25.0 | 29.0 | 0.32 | 14.17 | 26.71 |
| 103 | 4 | 1841 | 5.5 | 3.25 | 42.8 | 5.7 | 41.4 | 28.6 | 30.0 | 0.39 | 18.14 | 30.72 |
| 104 | 3 | 1850 | 5.2 | 1.00 | 15.2 | 5.8 | 44.0 | 28.0 | 28.0 | 0.37 | 16.65 | 26.13 |
| 105 | 3 | 1830 | 7.6 | 2.00 | 31.8 | 6.5 | 43.0 | 27.0 | 30.0 | 0.17 | 16.89 | 25.32 |
| 106 | 3 | 2300 | 5.4 | 2.50 | 26.4 | 5.5 | 44.0 | 28.0 | 28.0 | 0.41 | 16.00 | 8 |
| 107 | 7 | 1820 | 8.3 | 4.00 | 38.7 | 6.6 | 43.0 | 28.0 | 29.0 | 0.17 | 15.50 | 17.56 |
| 108 | 13 | 1889 | 3 | 3.25 | 37.3 | 5.9 | 45.0 | 26.0 | 29.0 | 0.15 | 13.56 | 25.13 |
| 109 | 5 | 2300 | 8.3 | 0.00 | 15.5 | 5.7 | 47.0 | 24.0 | 29.0 | 0.41 | 13.25 | 11.34 |
| 110 | 8 | 2300 | 4.5 | 3.00 | 15.3 | 5.5 | 45.0 | 26.0 | 29.0 | 0.41 | 16.51 | 20.87 |
| 111 | 9 | 2156 | 15 | 1.25 | 36.3 | 5.4 | 43.0 | 28.0 | 29.0 | 0.21 | 16.21 | 15.78 |
| 112 | 7 | 2150 | 11 | 1.00 | 35.6 | 5.4 | 43.0 | 28.0 | 29.0 | 0.22 | 18.18 | 5.61 |
| 113 | 7 | 2009 | 9 | 0.00 | 31.2 | 5.5 | 42.0 | 27.5 | 30.5 | 0.23 | 17.21 | 22.42 |
| 114 | 8 | 1926 | 8 | 2.50 | 26.3 | 5.7 | 42.0 | 28.0 | 30.0 | 0.46 | 17.62 | 23.52 |
| 115 | 9 | 2123 | 11 | 2.50 | 36.3 | 6.4 | 47.0 | 26.0 | 27.0 | 0.32 | 16.23 | 10.37 |
| 116 | 8 | 2315 | 21 | 3.25 | 28.8 | 5.5 | 46.0 | 26.0 | 28.0 | 0.21 | 14.00 | 3.57 |
| 117 | 13 | 2285 | 13 | 2.50 | 37.8 | 5.8 | 43.0 | 28.0 | 29.0 | 0.42 | 16.65 | 5.61 |
| 118 | 5 | 1984 | 11.3 | 4.00 | 28.3 | 6.5 | 44.0 | 27.0 | 29.0 | 0.15 | 17.12 | 2.28 |
| 119 | 13 | 2310 | 20 | 2.00 | 41.6 | 5.6 | 45.0 | 26.0 | 29.0 | 0.41 | 14.00 | 3.1 |
| 120 | 9 | 2221 | 15 | 1.25 | 38.8 | 5.7 | 46.0 | 26.0 | 28.0 | 0.21 | 15.89 | 6.26 |
| 121 | 12 | 2354 | 13 | 0.00 | 43.5 | 5.5 | 48.0 | 24.0 | 28.0 | 0.41 | 20.56 | 9.35 |
| 122 | 8 | 2351 | 16 | 2.50 | 41.6 | 5.5 | 49.0 | 25.0 | 26.0 | 0.41 | 16.48 | 6.61 |
| 123 | 6 | 2156 | 9 | 1.00 | 27.8 | 5.6 | 45.0 | 27.0 | 28.0 | 0.43 | 16.56 | 2.45 |
| 124 | 7 | 1956 | 6 | 1.25 | 29.5 | 6.5 | 43.0 | 28.0 | 29.0 | 0.44 | 21.00 | 0.16 |
| 125 | 6 | 2159 | 10 | 2.00 | 35.2 | 5.5 | 45.0 | 26.0 | 29.0 | 0.43 | 16.47 | 10.34 |
| 126 | 8 | 2300 | 4.5 | 0.00 | 33.5 | 5.4 | 46.0 | 25.0 | 29.0 | 0.41 | 13.36 | 19.37 |
| 127 | 7 | 1827 | 8.6 | 1.25 | 29.3 | 6.5 | 42.0 | 29.0 | 29.0 | 0.27 | 17.45 | 11.24 |
| 128 | 8 | 1965 | 7 | 3.00 | 30.2 | 6.2 | 44.0 | 27.0 | 29.0 | 0.44 | 22.20 | 48.64 |
| 129 | 11 | 2350 | 23 | 0.00 | 44.8 | 5.8 | 48.0 | 24.0 | 28.0 | 0.41 | 17.78 | 3.51 |
| 130 | 11 | 2250 | 10 | 2.50 | 35.3 | 5.5 | 44.0 | 27.0 | 29.0 | 0.41 | 18.21 | 20.51 |
| 131 | 7 | 2359 | 9 | 1.00 | 37.2 | 5.2 | 42.0 | 28.0 | 30.0 | 0.41 | 15.00 | 32.61 |
| 132 | 9 | 2340 | 25 | 2.50 | 44.8 | 5.3 | 46.0 | 27.0 | 27.0 | 0.41 | 16.54 | 26.52 |
| 133 | 6 | 2135 | 6 | 0.00 | 34.5 | 6.1 | 46.0 | 26.0 | 28.0 | 0.42 | 16.25 | 32.6 |
| 134 | 9 | 1958 | 4 | 1.25 | 27.5 | 6.3 | 43.0 | 28.0 | 29.0 | 0.45 | 14.56 | 14 |
| 135 | 11 | 2136 | 5 | 1.25 | 37.2 | 5.5 | 46.0 | 26.0 | 28.0 | 0.42 | 18.31 | 32.64 |
| 136 | 6 | 2050 | 5 | 2.50 | 26.4 | 5.8 | 44.0 | 28.0 | 28.0 | 0.42 | 19.15 | 39.34 |
| 137 | 14 | 2316 | 11 | 0.00 | 42.5 | 5.5 | 46.0 | 27.0 | 27.0 | 0.41 | 17.56 | 26 |
| 138 | 6 | 2258 | 7.3 | 4.00 | 39.4 | 5.5 | 46.0 | 27.0 | 27.0 | 0.31 | 16.64 | 48 |
| 139 | 10 | 2100 | 8 | 2.50 | 33.3 | 5.6 | 46.0 | 26.0 | 28.0 | 0.42 | 17.67 | 47.84 |
| 140 | 12 | 2089 | 9 | 1.00 | 26.4 | 5.1 | 47.0 | 26.0 | 27.0 | 0.43 | 15.84 | 26.26 |

**Note**: MC = moisture content of the soil, pH = soil pH, TN = total nitrogen, OM = organic matter, P = available phosphorus and HI = Harvesting index
